# Supplementary material for: Latent Dirichlet Allocation modeling of environmental microbiomes
Source: PLOS journal article supplement (doi:10.1371/journal.pcbi.1011075), 2023-06-08
Supplement: S5 (10.1371/journal.pcbi.1011075.s005) [file journal.pcbi.1011075.s005]

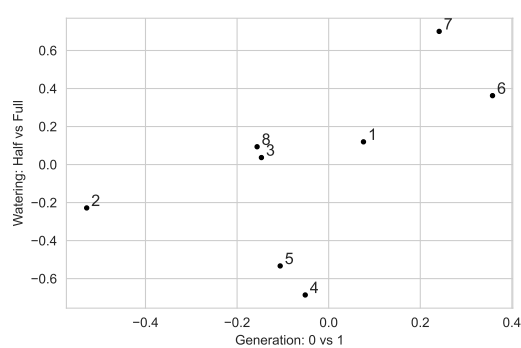

(a) Topic abundance weighting for the water treatment and generation.

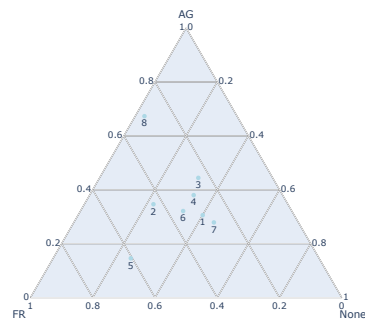

(b) Topic abundance weighting for the different soil microbiome inoculation source types.

Figure 4: *Class level*. Topic abundance weighting for the water treatment and generation, and for the different soil microbiome inoculation source types.
